# Supplementary material for: Comparison of Zotarolimus- and Everolimus-Eluting Coronary Stents: Final 5-Year Report of the RESOLUTE All-Comers Trial
Source: PubMed Central journal article supplement — Circ Cardiovasc Interv. 2015 Jun 16;8(6):1–8. doi: 10.1161/CIRCINTERVENTIONS.114.002230 (PMC4495878; doi:10.1161/circinterventions.114.002230), 2015-06-16
Supplement: hcv-8-1-s001.pdf [file hcv-8-1-s001.pdf]

## **SUPPLEMENTAL RESULTS**

### **Comparison of Zotarolimus and Everolimus Eluting Coronary Stents: Final 5-Year Report of the RESOLUTE All-Comers Trial**

Supplemental Table. ARC Defined Stent thrombosis during 5-year follow-up

| Complications                                    | Resolute (ZES)<br>(N=1140 Patients) | Xience-V (EES)<br>(N=1152 Patients) | Difference<br>[95% CI] | P-value |
|--------------------------------------------------|-------------------------------------|-------------------------------------|------------------------|---------|
| <b>Stent Thrombosis Related to Target Lesion</b> |                                     |                                     |                        |         |
| ARC Definite ST                                  | 1.6% (18/1123)                      | 0.8% (9/1133)                       | 0.8% [-0.1%, 1.7%]     | 0.084   |
| ARC Probable ST                                  | 0.9% (10/1123)                      | 0.9% (10/1133)                      | 0.0% [-0.8%, 0.8%]     | 1.00    |
| ARC Possible ST                                  | 4.5% (50/1123)                      | 3.8% (43/1133)                      | 0.7% [-1.0%, 2.3%]     | 0.46    |
| ARC Definite + Probable ST                       | 2.4% (27/1123)                      | 1.7% (19/1133)                      | 0.7% [-0.4%, 1.9%]     | 0.24    |
| ARC Definite + Probable + Possible ST            | 6.8% (76/1123)                      | 5.4% (61/1133)                      | 1.4% [-0.6%, 3.4%]     | 0.19    |
| <b>Acute (0 to 1 days)</b>                       |                                     |                                     |                        |         |
| ARC Definite ST                                  | 0.4% (4/1123)                       | 0.1% (1/1133)                       | 0.3% [-0.1%, 0.7%]     | 0.22    |
| ARC Probable ST                                  | 0.1% (1/1123)                       | 0.1% (1/1133)                       | 0.0% [-0.2%, 0.2%]     | 1.00    |
| ARC Possible ST                                  | 0.0% (0/1123)                       | 0.0% (0/1133)                       | 0.0% [--, --]          | -       |
| ARC Definite + Probable ST                       | 0.4% (5/1123)                       | 0.2% (2/1133)                       | 0.3% [-0.2%, 0.7%]     | 0.29    |
| ARC Definite + Probable + Possible ST            | 0.4% (5/1123)                       | 0.2% (2/1133)                       | 0.3% [-0.2%, 0.7%]     | 0.29    |
| <b>Sub-Acute (2 to 30 days)</b>                  |                                     |                                     |                        |         |
| ARC Definite ST                                  | 0.4% (5/1123)                       | 0.0% (0/1133)                       | 0.4% [0.1%, 0.8%]      | 0.030   |
| ARC Probable ST                                  | 0.3% (3/1123)                       | 0.4% (4/1133)                       | -0.1% [-0.5%, 0.4%]    | 1.00    |
| ARC Possible ST                                  | 0.0% (0/1123)                       | 0.0% (0/1133)                       | 0.0% [--, --]          | -       |
| ARC Definite + Probable ST                       | 0.7% (8/1123)                       | 0.4% (4/1133)                       | 0.4% [-0.2%, 1.0%]     | 0.26    |
| ARC Definite + Probable + Possible ST            | 0.7% (8/1123)                       | 0.4% (4/1133)                       | 0.4% [-0.2%, 1.0%]     | 0.26    |
| <b>Late (31 to 360 days)</b>                     |                                     |                                     |                        |         |
| ARC Definite ST                                  | 0.4% (5/1123)                       | 0.2% (2/1133)                       | 0.3% [-0.2%, 0.7%]     | 0.29    |
| ARC Probable ST                                  | 0.2% (2/1123)                       | 0.0% (0/1133)                       | 0.2% [-0.1%, 0.4%]     | 0.25    |
| ARC Possible ST                                  | 0.8% (9/1123)                       | 0.8% (9/1133)                       | 0.0% [-0.7%, 0.7%]     | 1.00    |
| ARC Definite + Probable ST                       | 0.6% (7/1123)                       | 0.2% (2/1133)                       | 0.4% [-0.1%, 1.0%]     | 0.11    |
| ARC Definite + Probable + Possible ST            | 1.3% (15/1123)                      | 1.0% (11/1133)                      | 0.4% [-0.5%, 1.2%]     | 0.44    |
| <b>Very Late (361 to 1800 days)</b>              |                                     |                                     |                        |         |
| ARC Definite ST                                  | 0.4% (5/1123)                       | 0.5% (6/1133)                       | -0.1% [-0.7%, 0.5%]    | 1.00    |

| Complications                                         | Resolute (ZES)<br>(N=1140 Patients) | Xience-V (EES)<br>(N=1152 Patients) | Difference<br>[95% CI] | P-value |
|-------------------------------------------------------|-------------------------------------|-------------------------------------|------------------------|---------|
| ARC Probable ST                                       | 0.4% (4/1123)                       | 0.4% (5/1133)                       | -0.1% [-0.6%, 0.4%]    | 1.00    |
| ARC Possible ST                                       | 3.7% (41/1123)                      | 3.0% (34/1133)                      | 0.7% [-0.8%, 2.1%]     | 0.41    |
| ARC Definite + Probable ST                            | 0.8% (9/1123)                       | 1.0% (11/1133)                      | -0.2% [-0.9%, 0.6%]    | 0.82    |
| ARC Definite + Probable + Possible ST                 | 4.5% (50/1123)                      | 3.9% (44/1133)                      | 0.6% [-1.1%, 2.2%]     | 0.53    |
| <b>Stent Thrombosis Related to Non Target Lesions</b> |                                     |                                     |                        |         |
| ARC Definite ST                                       | 0.4% (4/1123)                       | 0.1% (1/1133)                       | 0.3% [-0.1%, 0.7%]     | 0.22    |
| ARC Definite + Probable ST                            | 0.4% (4/1123)                       | 0.1% (1/1133)                       | 0.3% [-0.1%, 0.7%]     | 0.22    |
| ARC Definite + Probable + Possible ST                 | 0.4% (4/1123)                       | 0.1% (1/1133)                       | 0.3% [-0.1%, 0.7%]     | 0.22    |
| <b>Overall Stent Thrombosis</b>                       |                                     |                                     |                        |         |
| ARC Definite ST                                       | 2.0% (22/1123)                      | 0.9% (10/1133)                      | 1.1% [0.1%, 2.1%]      | 0.033   |
| ARC Definite + Probable ST                            | 2.8% (31/1123)                      | 1.8% (20/1133)                      | 1.0% [-0.2%, 2.2%]     | 0.12    |
| ARC Definite + Probable + Possible ST                 | 7.1% (80/1123)                      | 5.5% (62/1133)                      | 1.7% [-0.4%, 3.7%]     | 0.12    |
| <b>Early (0 to 30 days)</b>                           |                                     |                                     |                        |         |
| ARC Definite ST                                       | 0.8% (9/1123)                       | 0.1% (1/1133)                       | 0.7% [0.2%, 1.3%]      | 0.011   |
| ARC Definite + Probable ST                            | 1.1% (12/1123)                      | 0.5% (6/1133)                       | 0.5% [-0.2%, 1.3%]     | 0.16    |
| ARC Definite + Probable + Possible ST                 | 1.1% (12/1123)                      | 0.5% (6/1133)                       | 0.5% [-0.2%, 1.3%]     | 0.16    |
| <b>Late (31 to 360 days)</b>                          |                                     |                                     |                        |         |
| ARC Definite ST                                       | 0.4% (5/1123)                       | 0.2% (2/1133)                       | 0.3% [-0.2%, 0.7%]     | 0.29    |
| ARC Definite + Probable ST                            | 0.6% (7/1123)                       | 0.2% (2/1133)                       | 0.4% [-0.1%, 1.0%]     | 0.11    |
| ARC Definite + Probable + Possible ST                 | 1.3% (15/1123)                      | 1.0% (11/1133)                      | 0.4% [-0.5%, 1.2%]     | 0.44    |
| <b>Very Late (361 to 1800 days)</b>                   |                                     |                                     |                        |         |
| ARC Definite ST                                       | 0.8% (9/1123)                       | 0.6% (7/1133)                       | 0.2% [-0.5%, 0.9%]     | 0.63    |
| ARC Definite + Probable ST                            | 1.2% (13/1123)                      | 1.1% (12/1133)                      | 0.1% [-0.8%, 1.0%]     | 0.84    |
| ARC Definite + Probable + Possible ST                 | 4.8% (54/1123)                      | 4.0% (45/1133)                      | 0.8% [-0.9%, 2.5%]     | 0.36    |

All events were adjudicated by the independent Clinical Event Committee. For probable and possible stent thrombosis relation to target lesion or not could not be determined by the committee and all these have all been regarded as target lesion related.
